# Supplementary material for: Subsyndromal Delirium in Critically Ill Patients—Cognitive and Functional Long-Term Outcomes
Source: MDPI journal article supplement (doi:10.3390/jcm12196363), 2023-10-04
Supplement: s1 [file s1]

## Supplementary material:

**Table S1.** Medication in use, used at least once, during the study timeline.

|                        | No-delirium/no-SSD<br>(n=46) | SSD<br>(n=26)            | Delirium<br>(n=34)               | <i>p</i> -Value |
|------------------------|------------------------------|--------------------------|----------------------------------|-----------------|
| Alfentanil             | 0                            | 1 (3.8%)                 | 1 (2.9%)                         | 0.504           |
| Ketamine               | 1 (2.2%)                     | 0                        | 0                                | >0.999          |
| Dexmedetomidine        | 0                            | 0<br>( <i>p</i> =0.048)* | 7 (20.6%)<br>( <i>p</i> =0.048)* | <0.001          |
| Diazepam               | 0                            | 0                        | 0                                | -               |
| Fentanyl               | 1 (2.2%)                     | 1 (3.8%)                 | 1 (2.9%)                         | >0.999          |
| Haloperidol            | 0                            | 0                        | 4 (11.8%)                        | 0.012           |
| Midazolam              | 3 (6.5%)                     | 1 (3.8%)                 | 4 (11.8%)                        | 0.526           |
| Morphine               | 11 (23.9%)                   | 6 (23.1%)                | 9 (26.5%)                        | 0.947           |
| Propofol               | 11 (23.9%)                   | 12 (46.2%)               | 17 (50%)                         | 0.035           |
| Remifentanyl           | 2 (4.3%)                     | 3 (11.5%)                | 11 (32.4%)                       | 0.002           |
| Corticosteroid therapy | 13 (28.3%)                   | 4 (15.4%)                | 15 (44.1%)                       | 0.052           |

Legend: \* Bonferroni test between SSD and Delirium; SSD- Subsyndromal delirium.

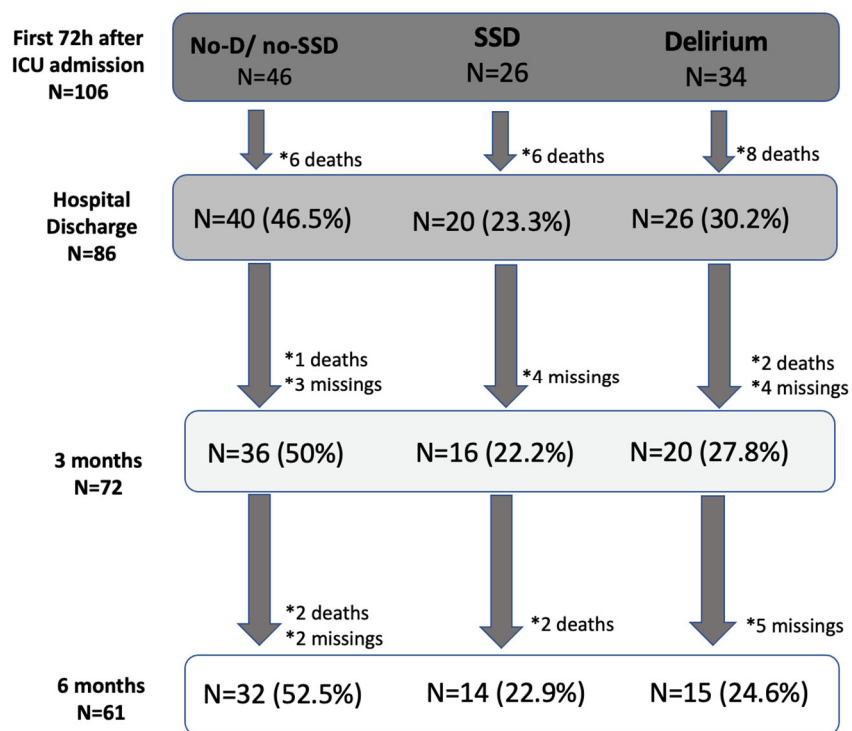

**Figure S1.** Vital status at 3 and 6 months after hospital discharge; SSD- Subsyndromal delirium.
